# Supplementary material
Source: publisher site journal article supplement (https://www.dovepress.com/get_supplementary_file.php?f=277927.docx)
Supplement: Supplementary file 1 [file get_supplementary_file.php]

**Supplemental figure 1.** ROC curve analysis of different markers to predict the survival status.


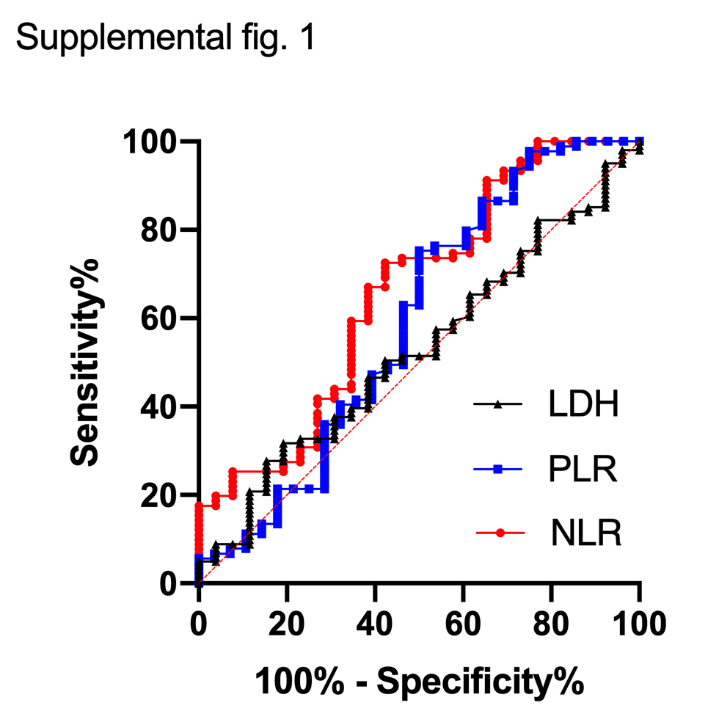


**Abbreviation:** ROC, receiver operating characteristic.
